# Supplementary material
Source: PubMed Central journal article supplement (PMC1800555)
Supplement: cmaj_176_4_463__1.pdf [file cmaj_176_4_463__1.pdf]

**Appendix 1: List of respiratory illnesses and corresponding International Classification of Diseases (ICD) codes used to identify hospital admissions and physician visits of interest\***

| Disease                                                   | ICD-9 code | ICD-10 code  |
|-----------------------------------------------------------|------------|--------------|
| Viral pneumonia                                           | 480        | J12          |
| Pneumonia due to adenovirus                               | 480.0      | J12.0        |
| Pneumonia due to respiratory syncytial virus              | 480.1      | J12.1        |
| Pneumonia due to parainfluenza virus                      | 480.2      | J12.2        |
| Pneumonia due to other virus, not classified elsewhere    | 480.8      | J12.8        |
| Viral pneumonia, unspecified                              | 480.9      | J12.9        |
| Pneumococcal and other bacterial pneumonia                | 481,482    | J13, J15     |
| Pneumonia due to other specified organism                 | 483        | J16.8        |
| Pneumonia in infectious diseases classified elsewhere     | 484        | J17          |
| Bronchopneumonia, organism unspecified                    | 485        | J18.0        |
| Pneumonia, organism unspecified                           | 486        | J18.9        |
| Influenza                                                 | 487        | J10, J11     |
| With pneumonia                                            | 487.0      | J10.0, J11.0 |
| With other respiratory manifestation                      | 487.1      | J10.1, J11.1 |
| With other manifestation                                  | 487.8      | J10.8, J11.8 |
| Acute nasopharyngitis                                     | 460        | J00          |
| Acute sinusitis                                           | 461        | J01          |
| Acute pharyngitis                                         | 462        | J02          |
| Acute tonsillitis                                         | 463        | J03          |
| Acute laryngitis and tracheitis                           | 464        | J04          |
| Acute upper respiratory tract infection of multiple sites | 465        | J06          |
| Acute bronchitis and bronchiolitis                        | 466        | J20, J21     |
| Bronchitis, not specified as acute or chronic             | 490        | J22          |
| Chronic bronchitis                                        | 491        | J42          |
| Acute myocarditis†                                        | 422        | I40          |
| Heart failure†                                            | 428        | I50          |

\*Hospital discharge diagnoses are coded using the International Classification of Diseases 9th revision (ICD-9) until 2001 and the 10th revision (ICD-10) after 2001. Diagnoses from family physician office visits, specialist office visits and emergency department visits are coded using the ICD-9.

†Cardiac disease included because it is potentially associated with influenza-related respiratory illness.
